# Supplementary material for: PACAP-PAC1R modulates fear extinction via the ventromedial hypothalamus
Source: PubMed Central journal article supplement (PMC9334354; doi:10.1038/s41467-022-31442-w), 2022-07-28
Supplement: 41467_2022_31442_MOESM2_ESM.pdf [file 41467_2022_31442_MOESM2_ESM.pdf]

## Description of Additional Supplementary Files

**Supplementary Data 1:** Statistics performed for PACAP-PAC1R modulates fear extinction via the ventromedial hypothalamus.
